# Supplementary material for: Effects of Thyroid Hormone on A1C and Glycated Albumin Levels in Nondiabetic Subjects With Overt Hypothyroidism
Source: PubMed Central journal article supplement — Diabetes Care. 2010 Sep 7;33(12):2546–8. doi: 10.2337/dc10-0988 (PMC2992186; doi:10.2337/dc10-0988), 2010-09-07

**Supplementary Table 1.** Clinical characteristics of patients with overt hypothyroidism, compared to age- and sex-matched healthy controls in Study 1.

|                  | <b>Hypothyroidism</b> | <b>Euthyroidism<br/>(Control)</b> | <b>P-value</b> |
|------------------|-----------------------|-----------------------------------|----------------|
| N                | 45                    | 180                               |                |
| Age (years)      | 46.87±9.82            | 47.10±10.99                       | 0.897          |
| Sex (M/F)        | 6/39                  | 33/147                            | 0.428          |
| TSH (mIU/L)      | 96.11±48.01           | 2.17±1.06                         | <0.001         |
| Glucose (mmol/L) | 4.87±0.37             | 5.06±0.32                         | 0.001          |
| A1C (%)          | 5.54±0.43             | 5.34±0.31                         | <0.001         |
| Hb (g/dL)        | 13.97±1.10            | 13.65±1.01                        | 0.054          |
| MCV (fL)         | 88.47±3.32            | 91.16±3.23                        | <0.001         |
| MCH (pg)         | 29.97±1.38            | 30.99±1.29                        | <0.001         |

M, male; F, female; A1C, glycated hemoglobin; Hb, hemoglobin; MCV, mean corpuscular volume; MCH, mean corpuscular hemoglobin.

**Supplementary Figure 1.** A1C levels in 6 non-diabetic patients according to their thyroid function.

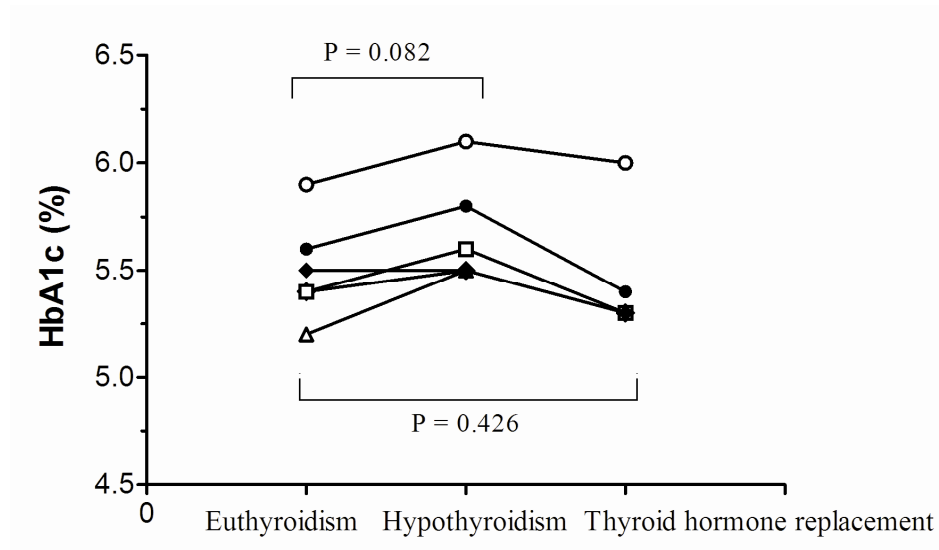

Supplement: supp_dc10-0988_dc100988onlineappendix.pdf [file supp_dc10-0988_dc100988onlineappendix.pdf]
